# Supplementary material
Source: HighWire-hosted journal article supplement (https://jnis.bmj.com/highwire/filestream/175115/field_highwire_adjunct_files/1/jnis-2022-019456supp002_data_supplement.pdf)
Supplement: jnis-2022-019456supp002_data_supplement.pdf [file jnis-2022-019456supp002_data_supplement.pdf]

**Supplemental Figures**

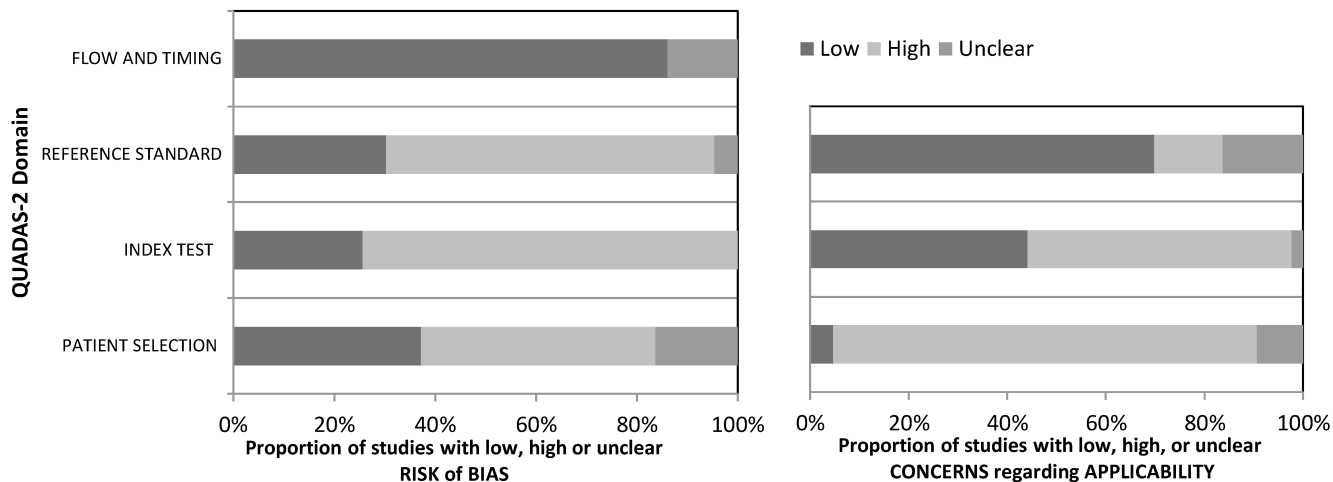

Supplemental figure 1: Summary of quality assessment of studies using the Quality Assessment of Diagnostic Accuracy Studies Two (QUADAS 2) tool.

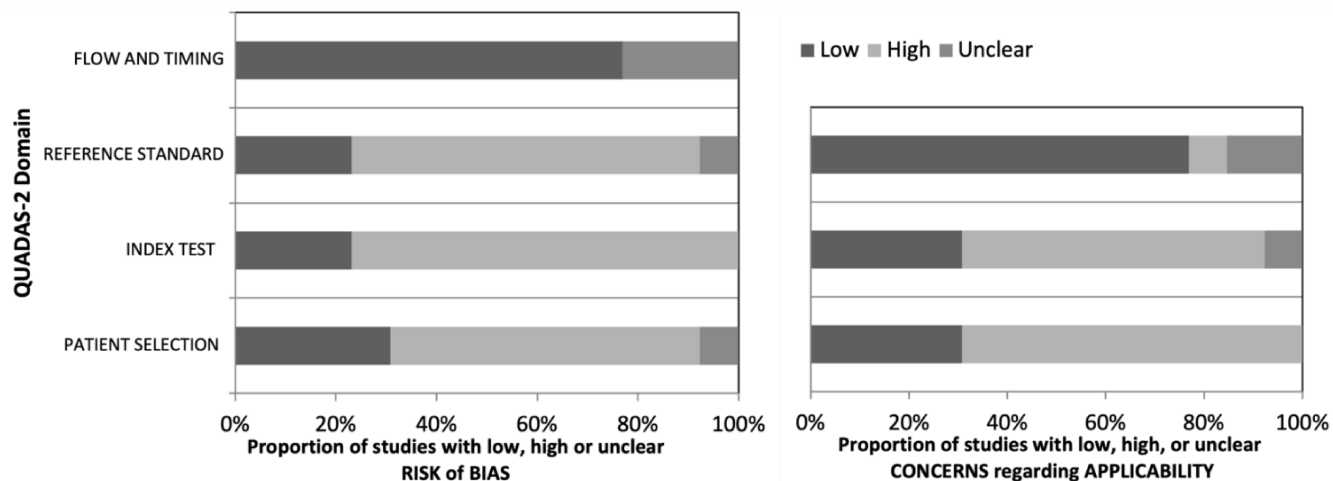

Supplemental figure 2: Summary of quality assessment of studies using the Quality Assessment of Diagnostic Accuracy Studies Two (QUADAS 2) tool for studies published before 2018.

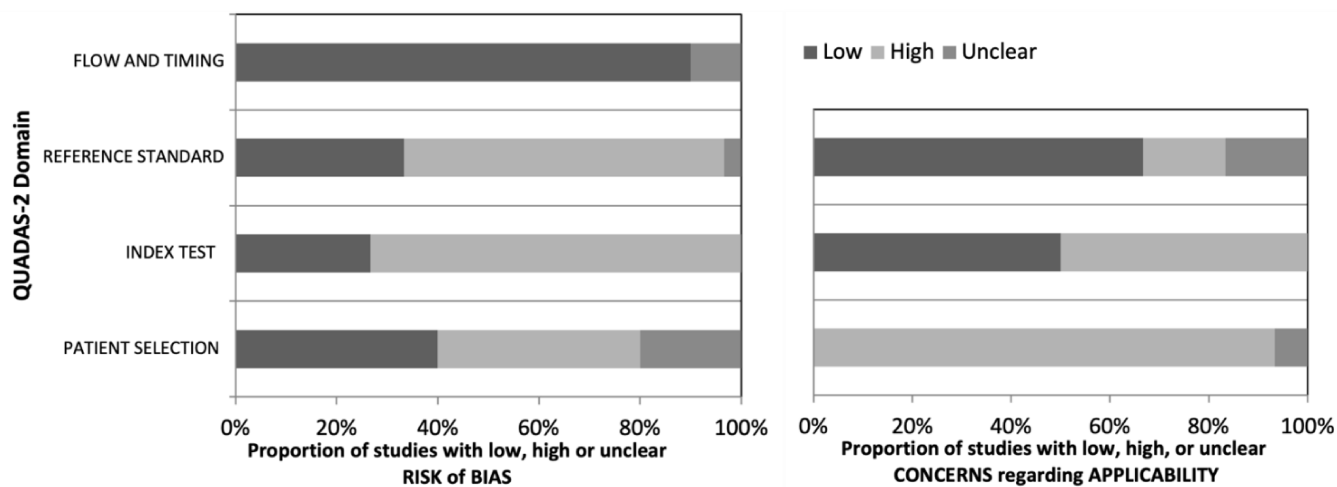

Supplemental figure 3: Summary of quality assessment of studies using the Quality Assessment of Diagnostic Accuracy Studies Two (QUADAS 2) tool for studies published in 2018 or later.
